# Supplementary material
Source: bioRxiv or medRxiv preprint supplement (https://www.biorxiv.org/highwire/filestream/13805/field_highwire_adjunct_files/2/050641-3.pdf)

# Supplemental Figure 3 – Platform Spatial Specificity

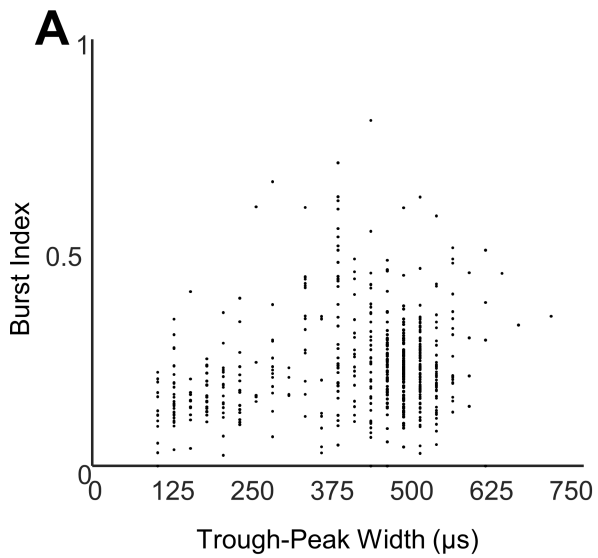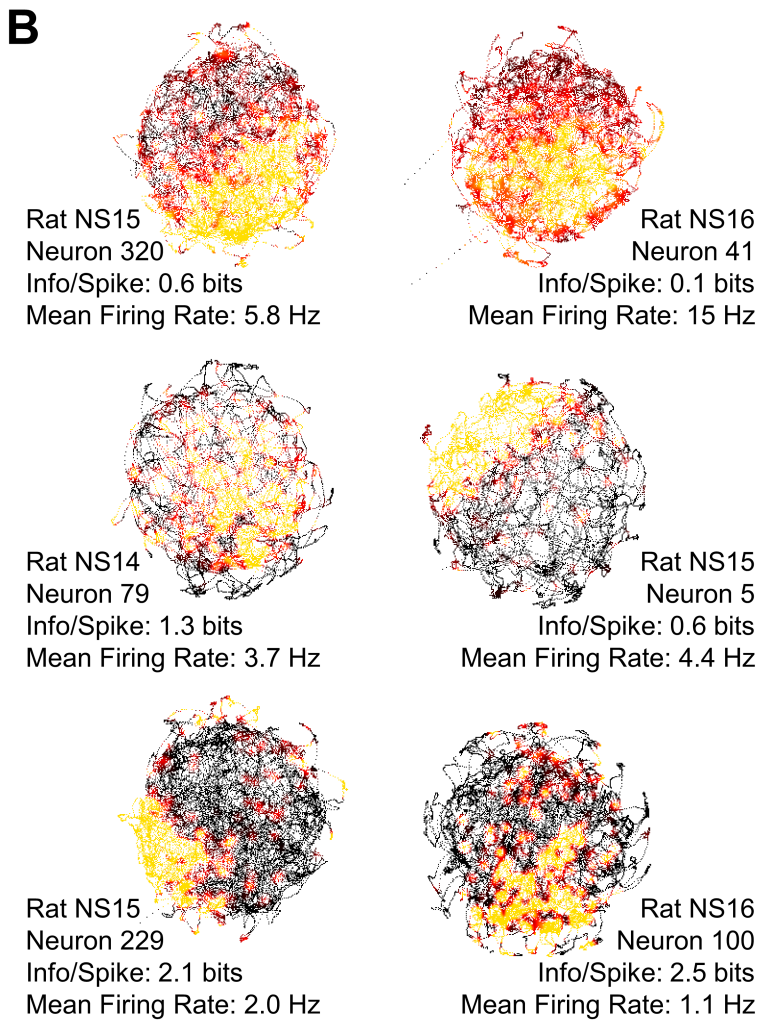

Supplement: Supplementary file [file 050641-3.pdf]
